# Supplementary material for: Directed networks reveal genomic barriers and DNA repair bypasses to lateral gene transfer among prokaryotes
Source: HighWire-hosted journal article supplement (doi:10.1101/gr.115592.110), 2011-01-26

## SUPPLEMENTARY MATERIAL

|                                                                                                       |    |
|-------------------------------------------------------------------------------------------------------|----|
| Figure S1. Edge weight in the directed network of recent lateral gene transfers.....                  | 2  |
| Figure S2. Community structure within the dLGT network. ....                                          | 3  |
| Figure S3-A. Donor-recipient similarity by <i>Sgs</i> .....                                           | 4  |
| Figure S3-B. Donor-recipient similarity by <i>Spr</i> .....                                           | 5  |
| Figure S3-C. Donor-recipient similarity by <i>Sgc</i> .....                                           | 6  |
| Figure S4. Intergeneric network.....                                                                  | 7  |
| Figure S5. Distribution of transferred genes having unknown function across taxa. ....                | 8  |
| Figure S6. Pathogens and nonpathogens in the dLGT network.....                                        | 9  |
| Figure S7. Distribution of IN and OUT degree in pathogens and nonpathogens .....                      | 10 |
| Figure S8. Overlap between the orthogroup by rBBH and MCL algorithms. ....                            | 11 |
| Figure S9. Model for change in GC content similarity as a function of evolutionary distance.<br>..... | 12 |
| Figure S10. Phylogenetic inference of donor and recipient species. ....                               | 13 |

## SUPPLEMENTARY MATERIAL

**Figure S1. Edge weight in the directed network of recent lateral gene transfer**  
Edges in the network are colored by the number of genes transferred from the donor to the recipient that they connect (see color legend at the bottom).

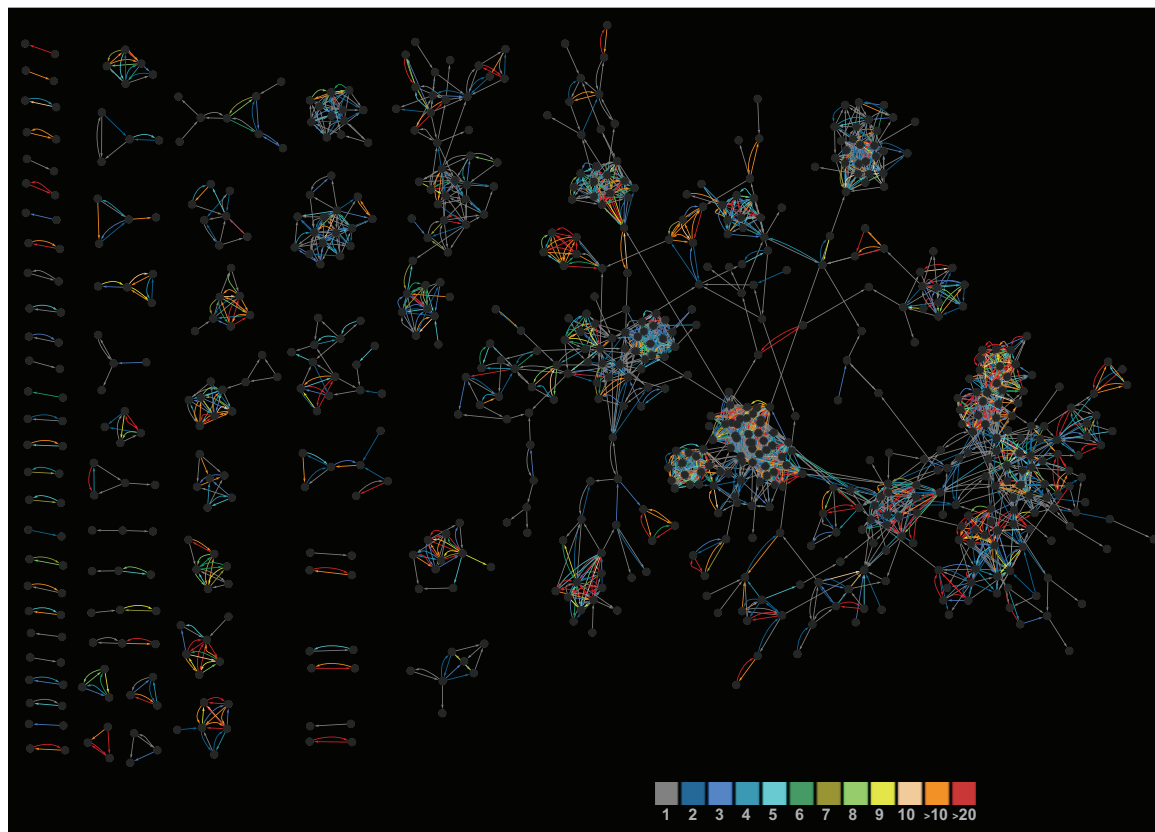

## SUPPLEMENTARY MATERIAL

**Figure S2. Community structure within the dLGT network.**  
Vertices that are grouped into the same module are colored the same.

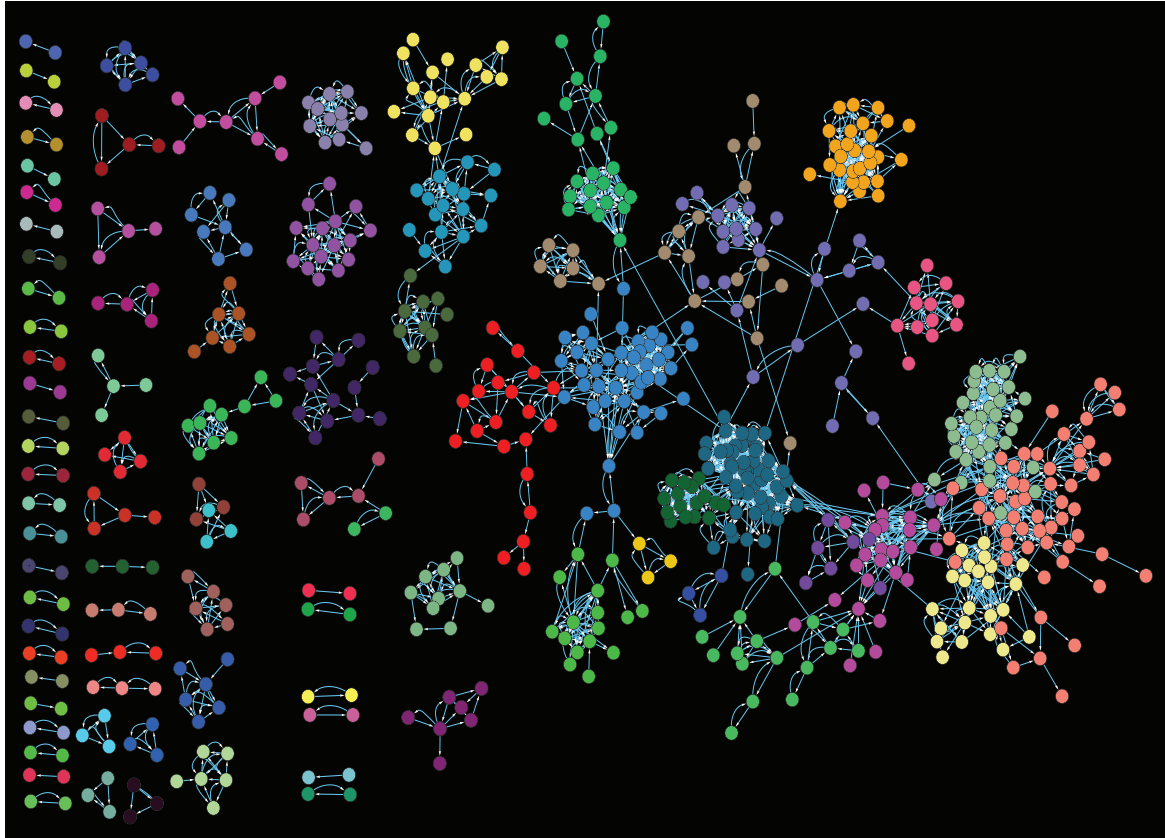

## SUPPLEMENTARY MATERIAL

**Figure S3-A. Donor-recipient similarity by  $S_{gs}$ .**

Color-coded matrix of donor (y-axis) and recipient (x-axis) genome similarity ( $S_{gs}$ ) for all genome pairs, sorted by taxonomical classification.

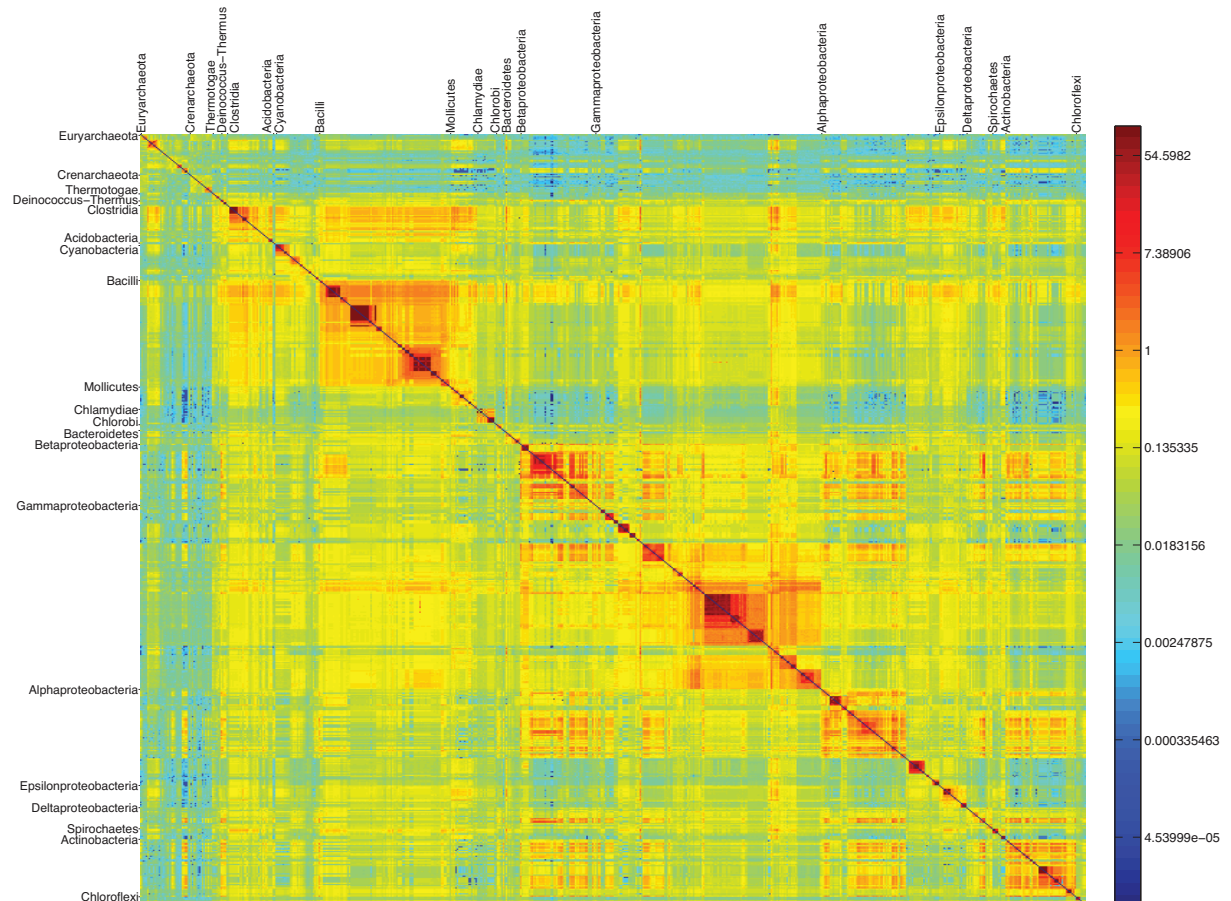

## SUPPLEMENTARY MATERIAL

**Figure S3-B. Donor-recipient similarity by *Spr*.**

Color-coded matrix of donor (y-axis) and recipient (x-axis) proteome similarity ( $S_{pr}$ ) for all genome pairs, sorted by taxonomical classification.

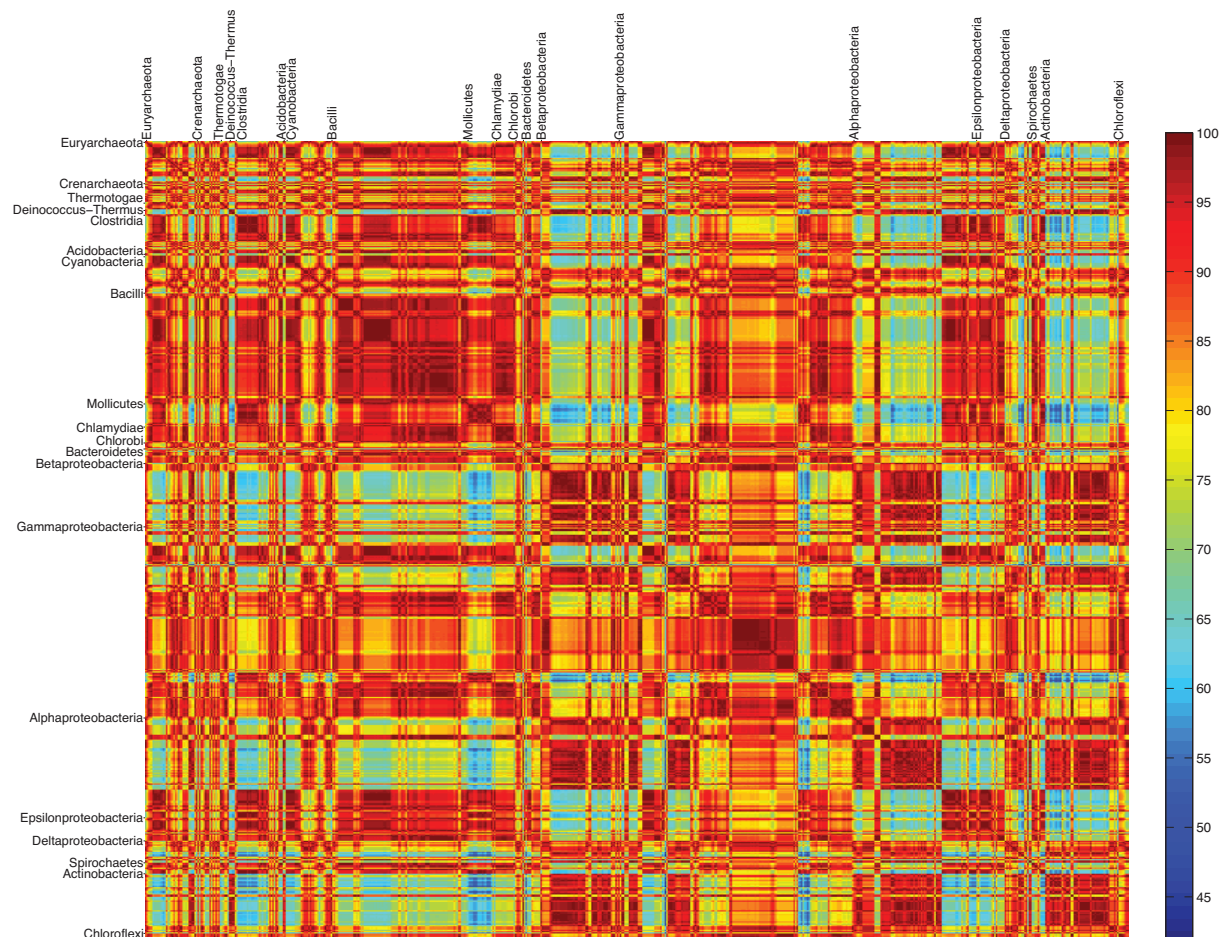

## SUPPLEMENTARY MATERIAL

**Figure S3-C. Donor-recipient similarity by  $S_{gc}$ .**

Color-coded matrix of donor (y-axis) and recipient (x-axis) GC content similarity ( $S_{gc}$ ) for all genome pairs, sorted by taxonomical classification.

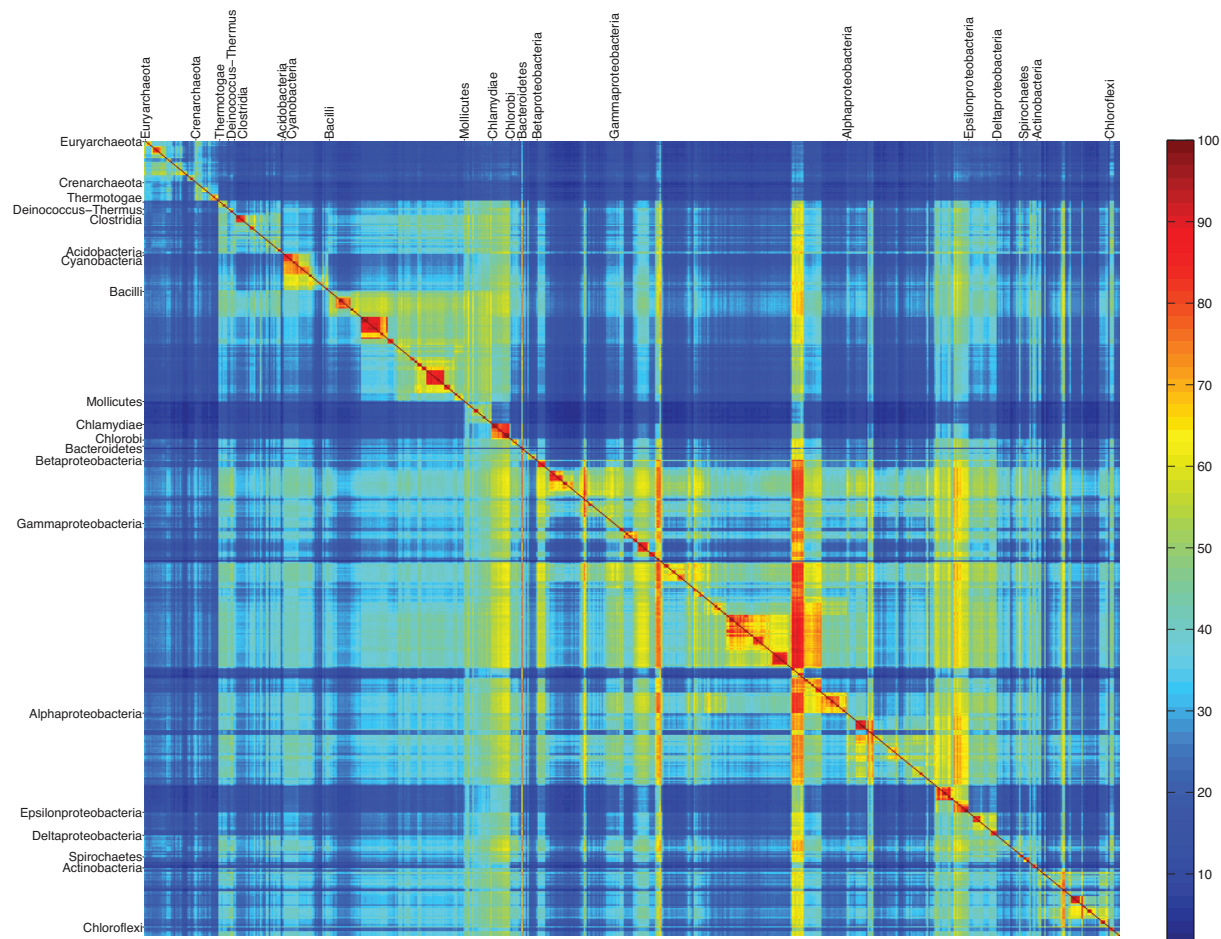

## SUPPLEMENTARY MATERIAL

### Figure S4. Intergeneric network.

(A) the intergeneric network. Each vertex represents all species from a certain genus. Edges represent one or more recent LGT between species from the genus-vertex they connect. (B) distribution of IN degree and OUT degree in the network. (C) Distribution of edge weight in the network.

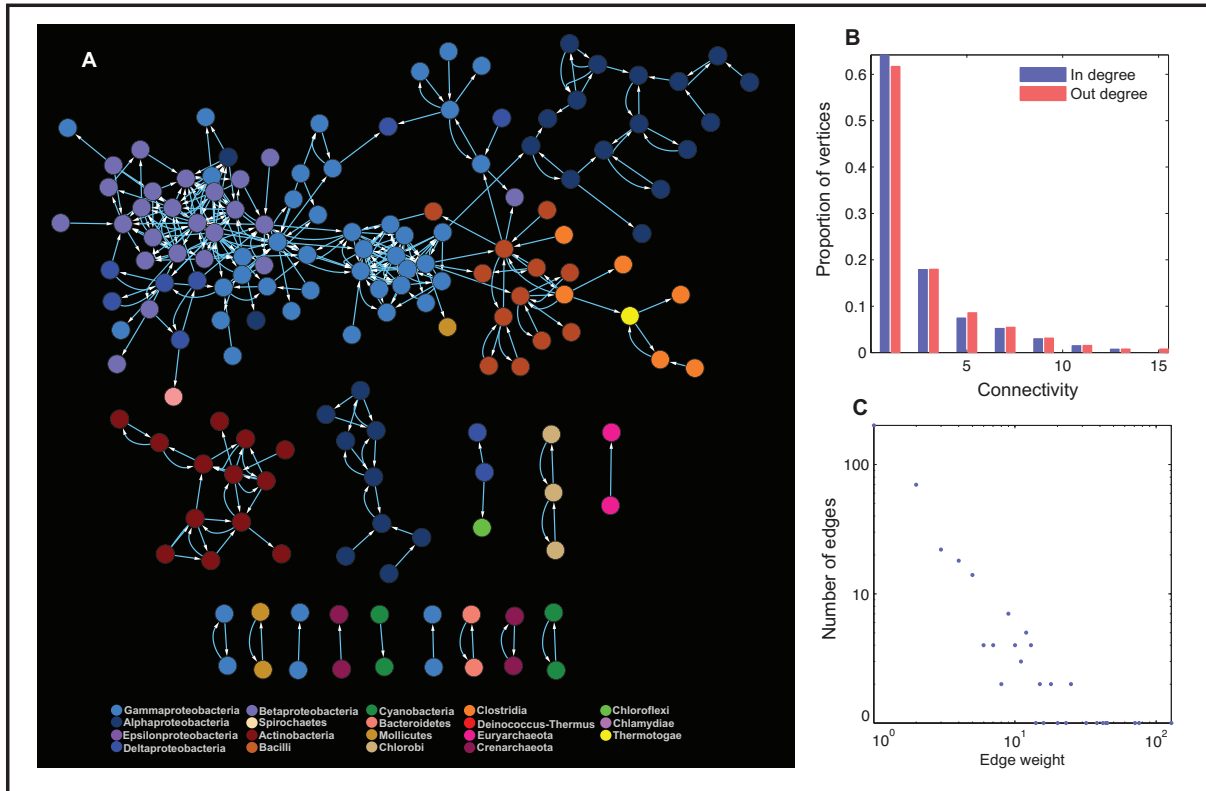

## SUPPLEMENTARY MATERIAL

**Figure S5. Distribution of transferred genes having unknown function across taxa.**

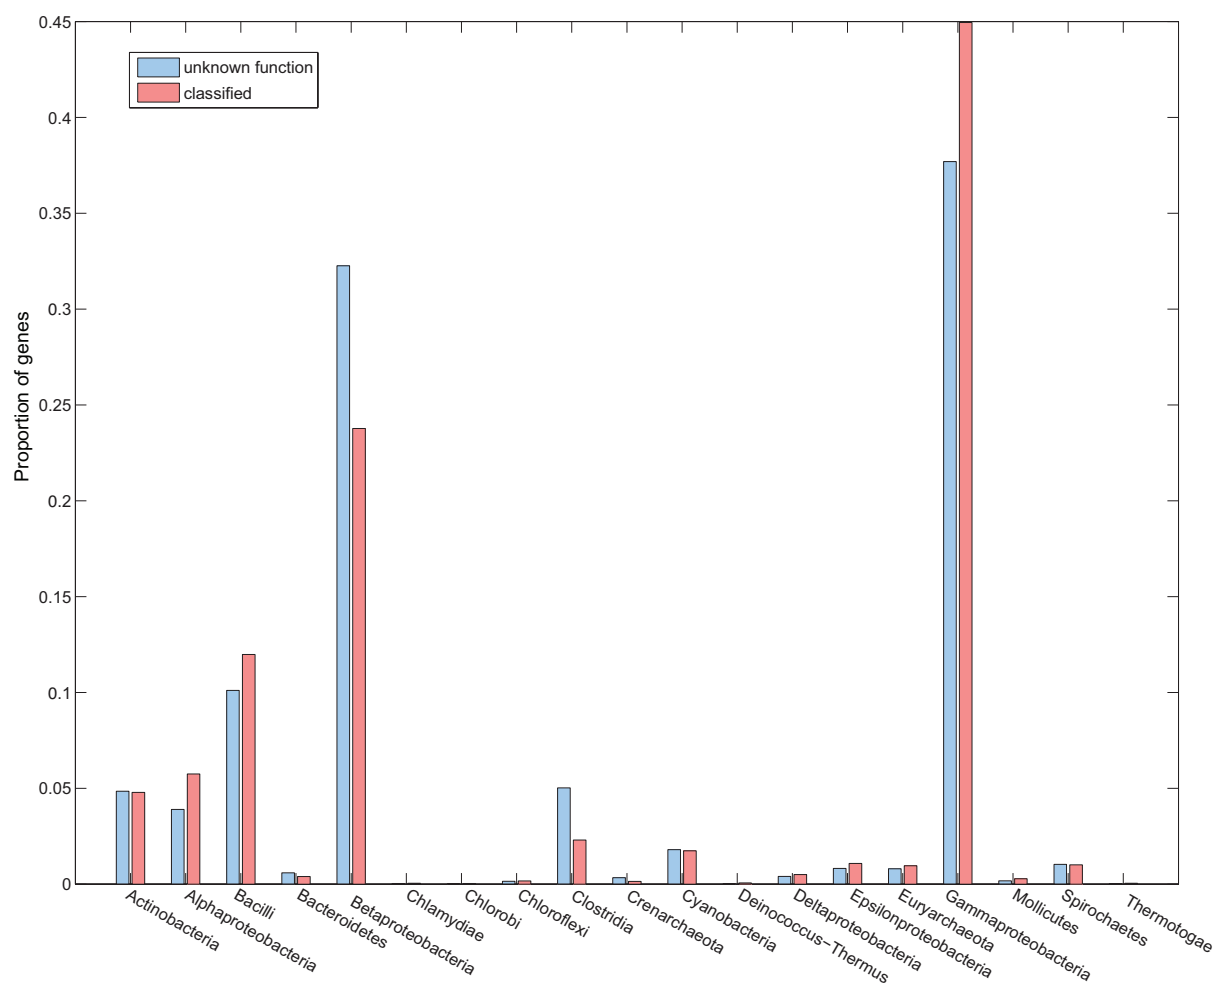

## SUPPLEMENTARY MATERIAL

**Figure S6. Pathogens and nonpathogens in the dLGT network.**

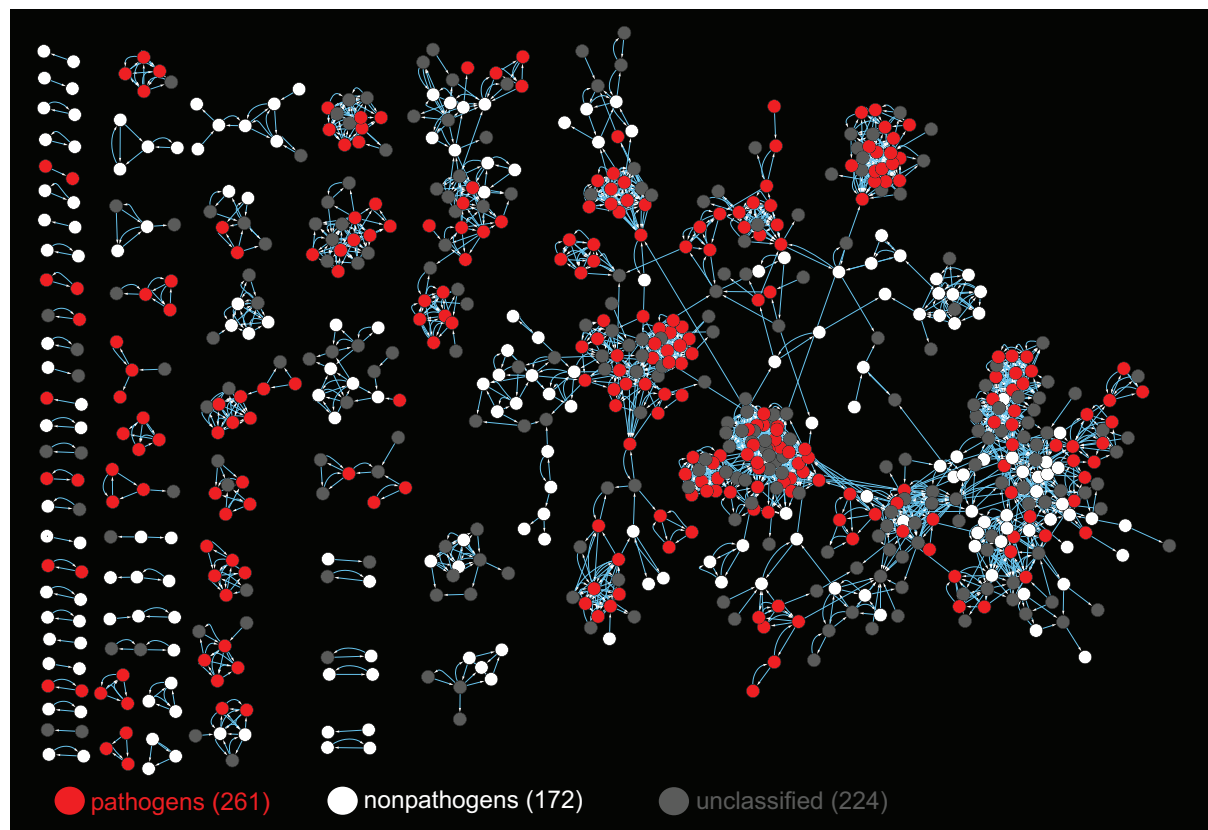

# SUPPLEMENTARY MATERIAL

**Figure S7. Distribution of IN and OUT degree in pathogens and nonpathogens**

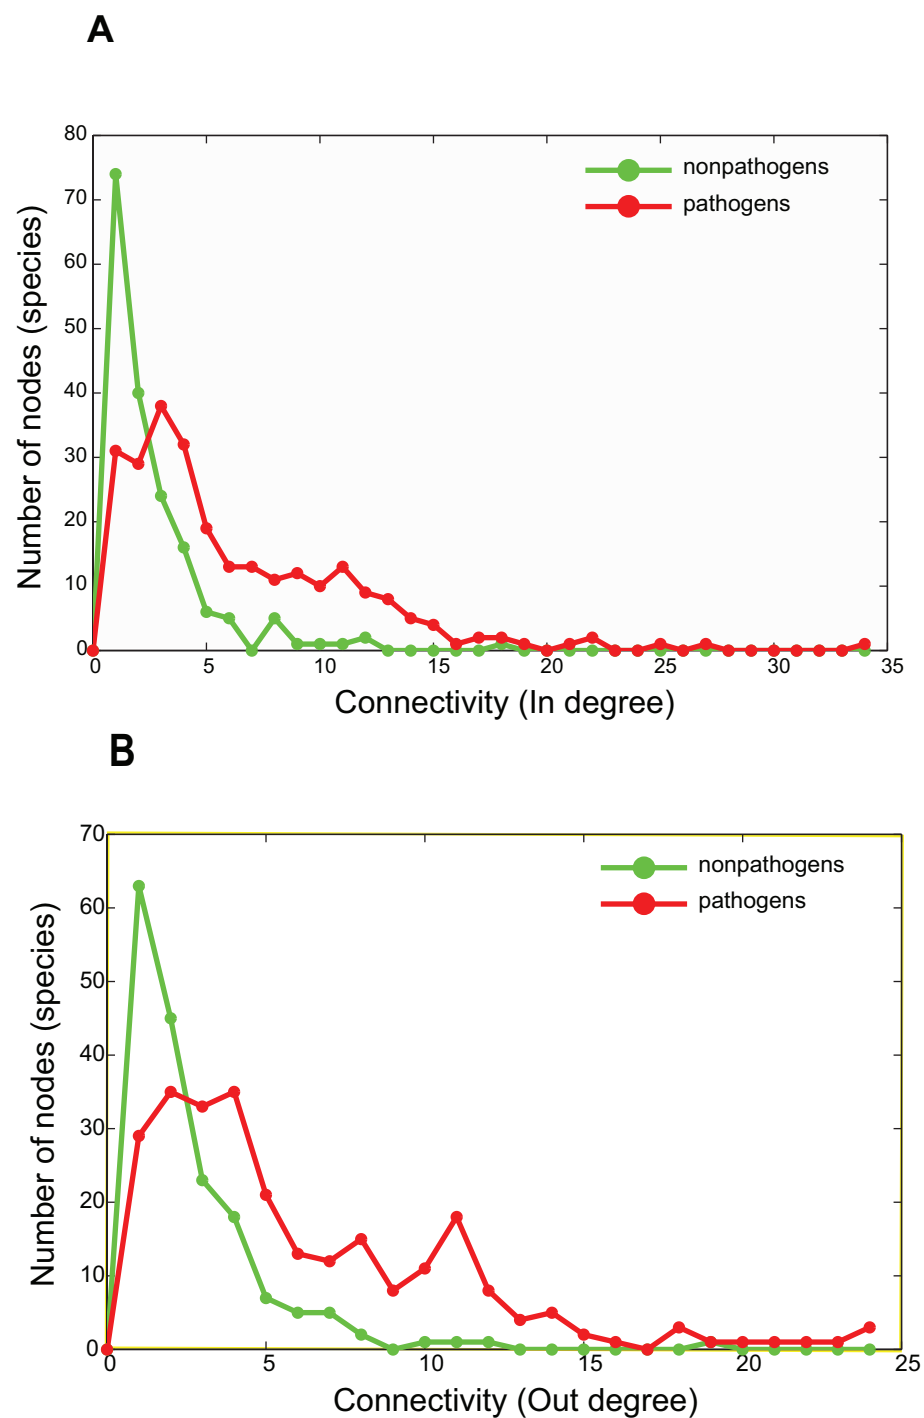

## SUPPLEMENTARY MATERIAL

**Figure S8. Overlap between the orthogroup by rBBH and MCL algorithms.**

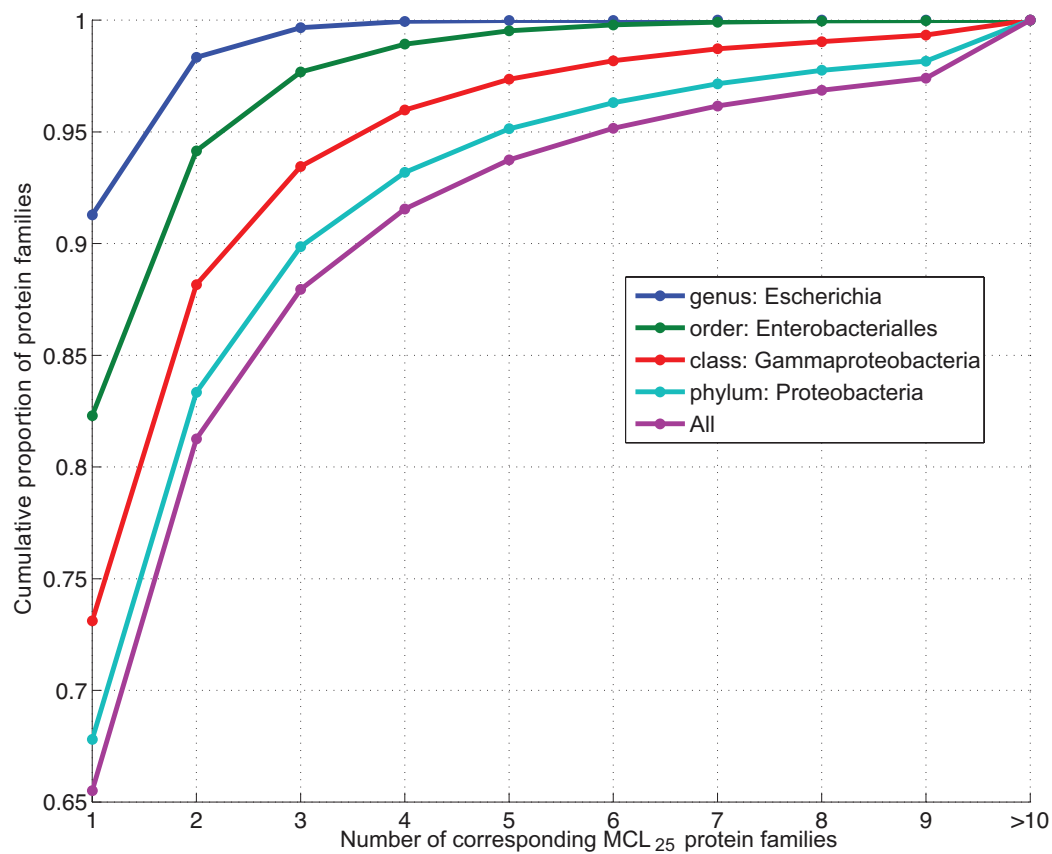

## SUPPLEMENTARY MATERIAL

### Figure S9. Model for change in GC content similarity as a function of evolutionary distance.

The top figure shows the distribution of sample size in the model. The figure at the bottom shows 95% percentile of GC content similarity for the samples at the top by the number of different nucleotides.

A

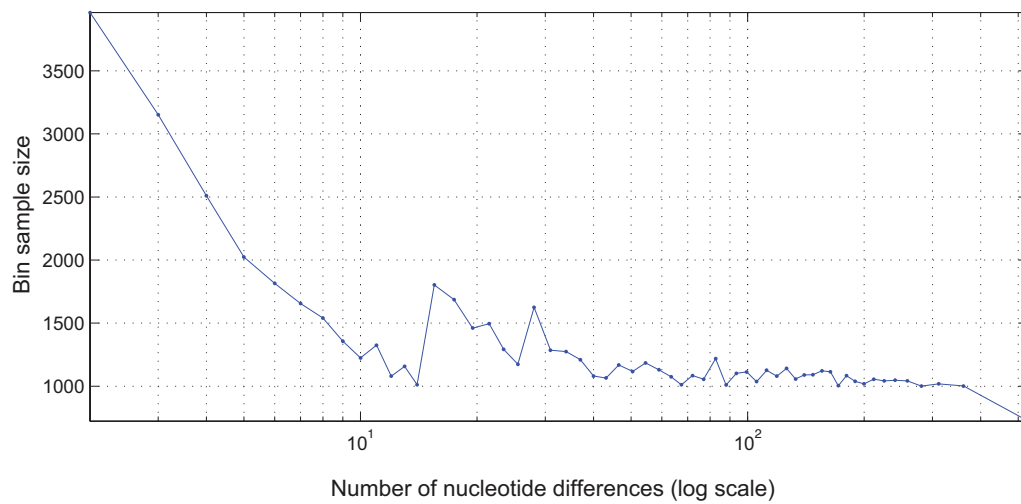

B

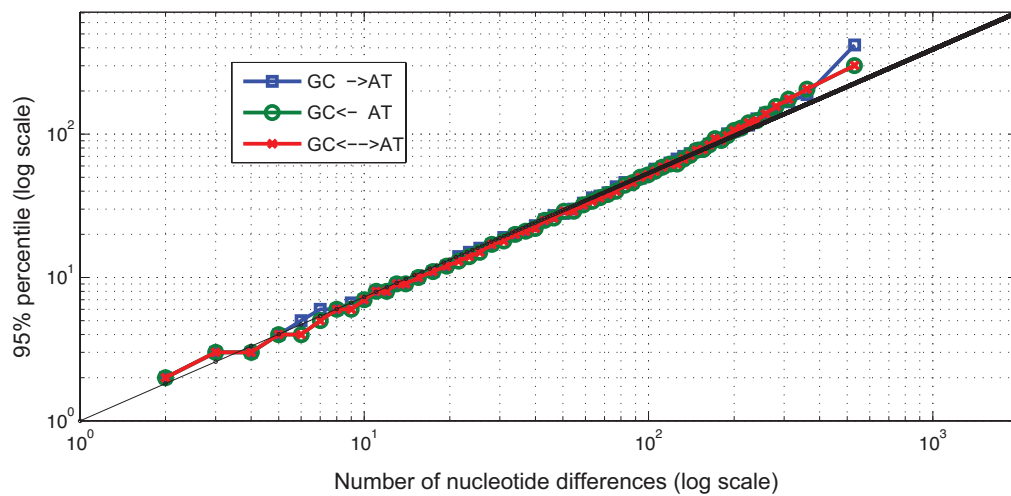

SUPPLEMENTARY MATERIAL

Figure S10. Phylogenetic inference of donor and recipient species.

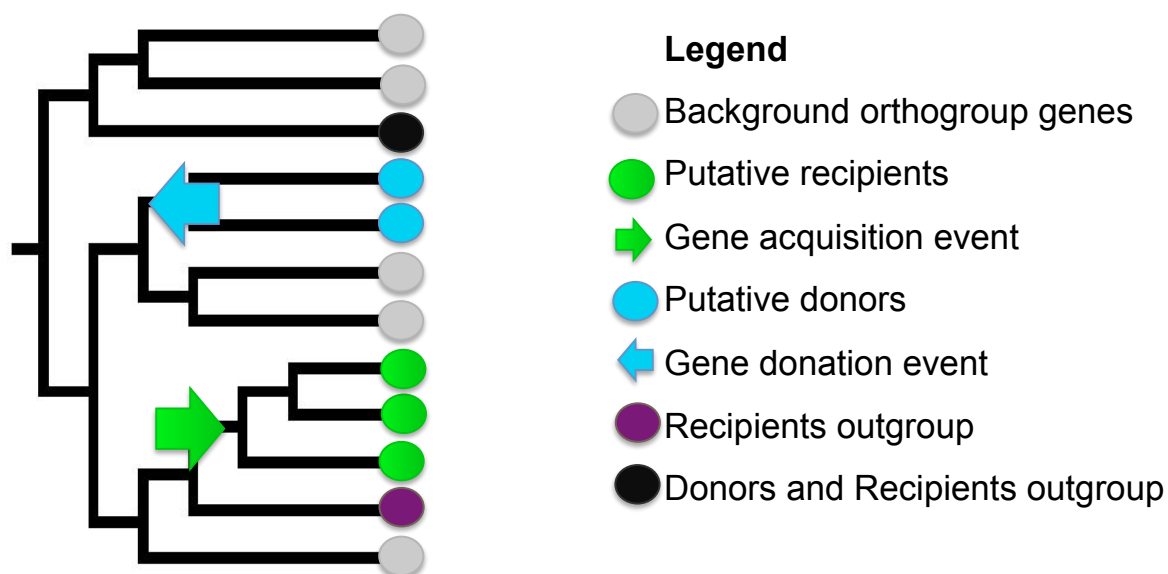

Supplement: Popa_Etal_SuppFigures-revision.pdf [file Popa_Etal_SuppFigures-revision.pdf]
